# Supplementary material for: Loss of Anti-Tumor Efficacy by Polyamine Blocking Therapy in GCN2 Null Mice
Source: MDPI journal article supplement (doi:10.3390/biomedicines11102703), 2023-10-05
Supplement: s1 [file s1]

Sup. Fig. S1

A

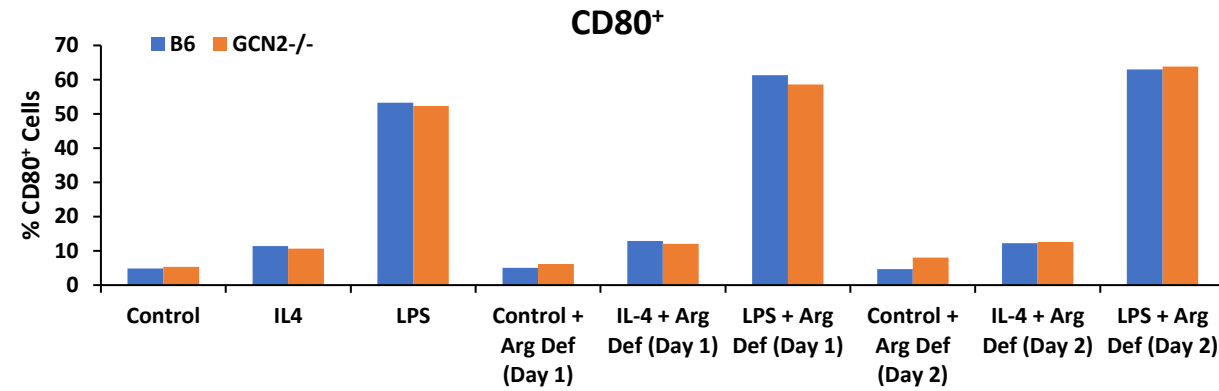

B

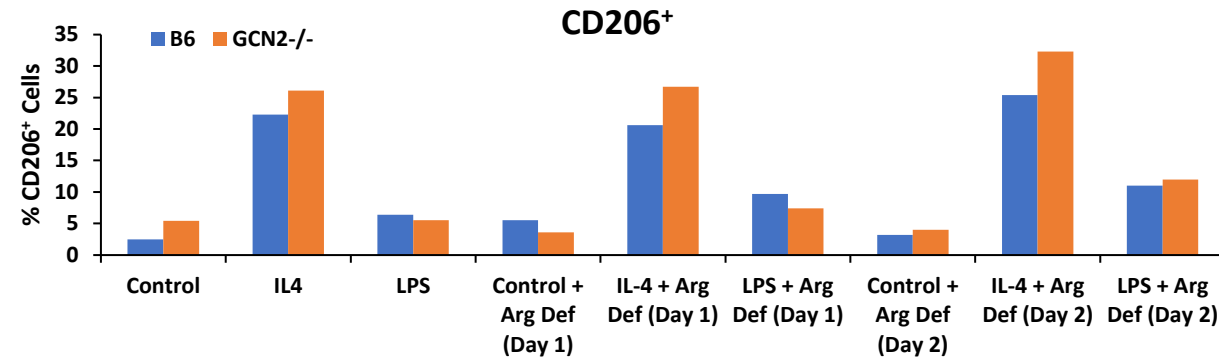

**Supplementary Figure S1: Arginine deficiency has no effect on macrophage polarization.** Bone marrow-derived macrophages from C57Bl/6 or GCN2 null mice were polarized to M2-like macrophages with IL-4 treatment or to M1-like macrophages with LPS treatment in either complete or arginine-deficient (Arg Def) media for one or two days. Macrophages were analyzed by flow cytometry for (A) CD80<sup>+</sup> M1 polarized macrophages, (B) CD206<sup>+</sup> M2 polarized macrophages
